# Supplementary material
Source: Springer Nature journal article supplement (https://www.springermedizin.de/resource/supplementary/13223_2014_510_MOESM1_ESM.pdf/9596688)
Supplement: MOESM1 [file 9596688]

**Rapid weight gain  
in infancy**

**Formula**

**Excess protein**

**mTORC1 ↑**

**BMI ↑  
Obesity**

**Allergy**
